# Supplementary material
Source: publisher site journal article supplement (https://www.dovepress.com/article/460300)
Supplement: Supplementary file 1 [file get_supplementary_file.php]

# Supplementary

## Supplementary Table 1. Cities where the Asthma Disease Specific Programme (2018 version) was conducted

| **Tier** | **Province** | **City** |
| --- | --- | --- |
| **Tier 1** | – | Beijing |
| – | Shanghai |
| Guangdong | Guangzhou |
| **Tier 2** | Hubei | Wuhan |
| Jiangsu | Nanjing |
| Liaoning | Shenyang |
| Shaanxi | Xi’an |
| Sichuan | Chengdu |
| **Tier 3** | Guangdong | Foshan |
| Jiangmen |
| Jiangsu | Nantong |
| Wuxi |
| Sichuan | Luzhou |
| Mianyang |
| **Tier 4** | Guangdong | Qingyuan |
| Zhaoqing |
| Sichuan | Dujiangyan |
| Guanghan |
| Luxin County |
